# Supplementary material for: Activation of a microRNA response in trans reveals a new role for poly(A) in translational repression
Source: PubMed Central journal article supplement — Nucleic Acids Res. 2011 Mar 8;39(12):5215–31. doi: 10.1093/nar/gkr086 (PMC3130266; doi:10.1093/nar/gkr086), 2011-03-08

Supplementary Figure 1

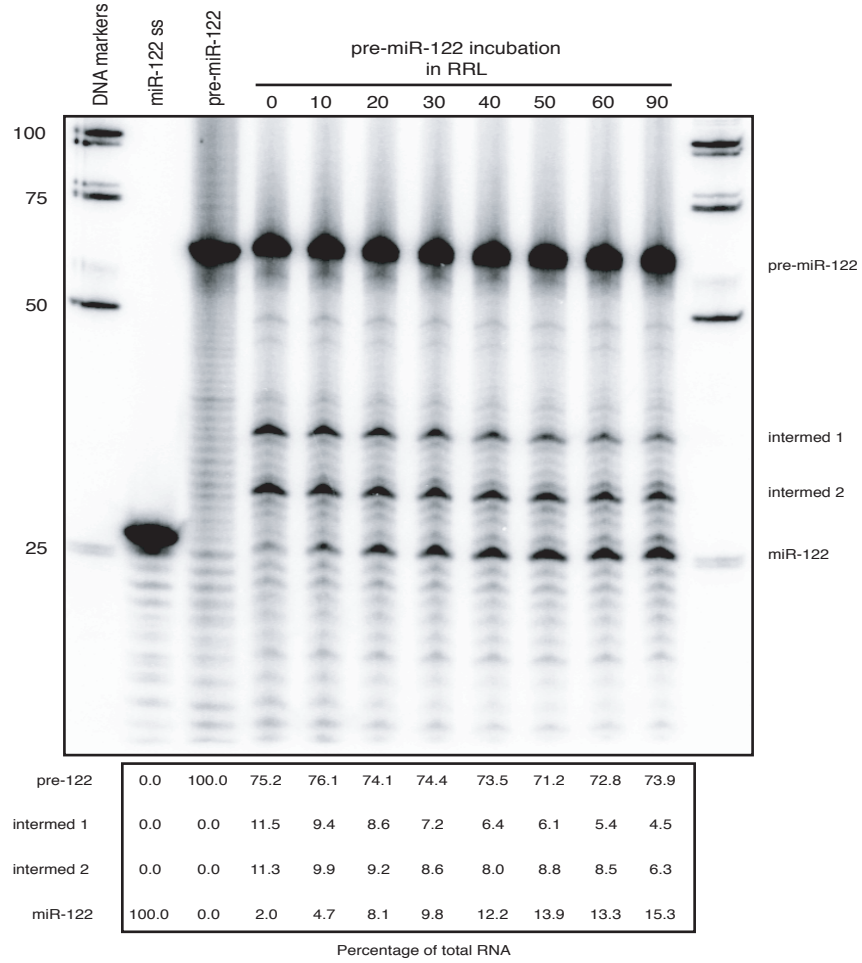

Supplementary Figure 2

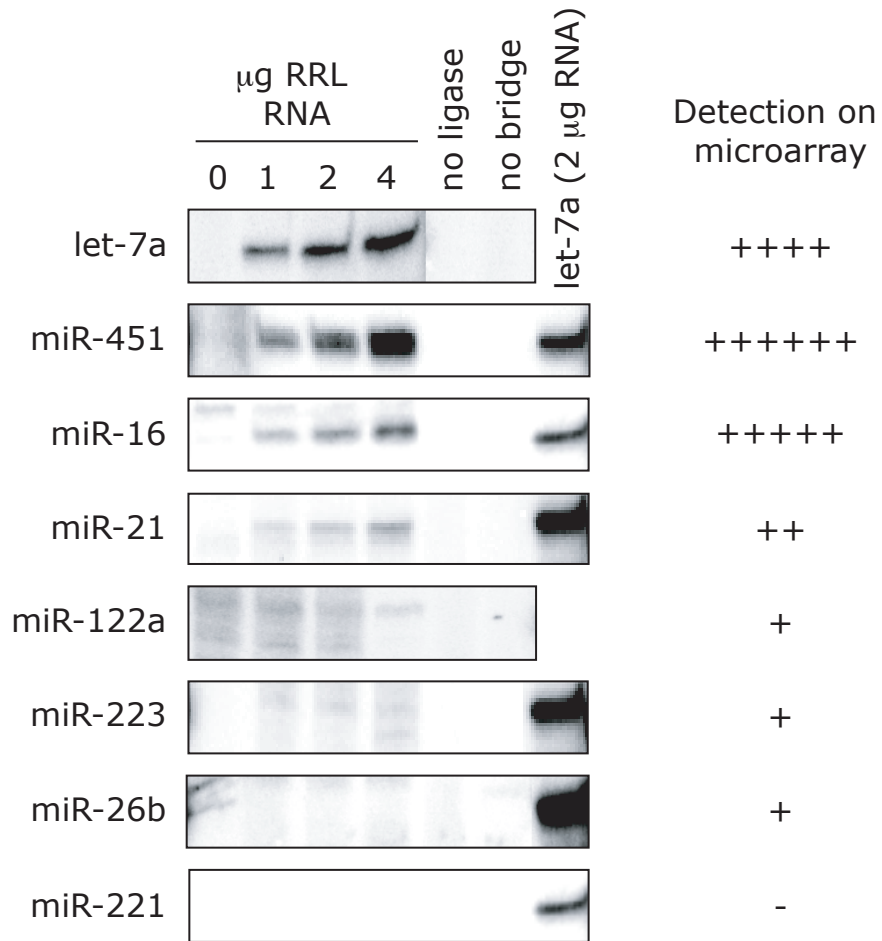

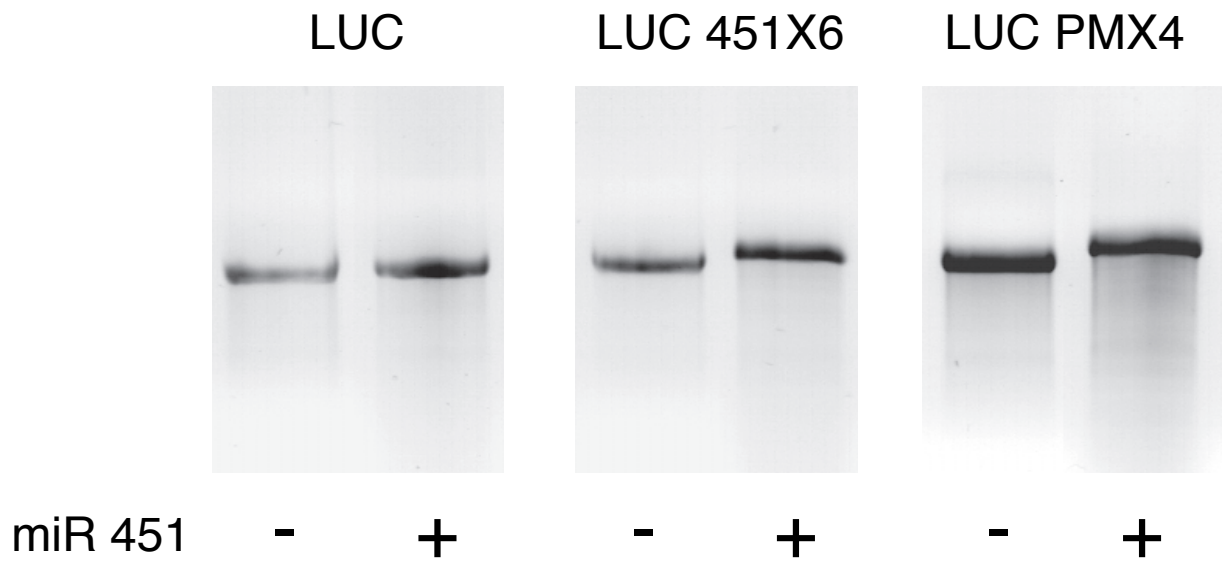

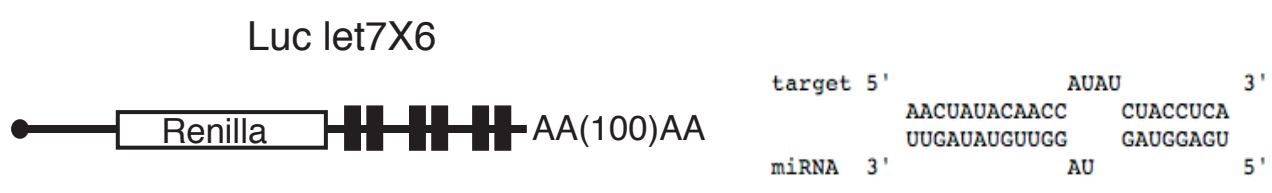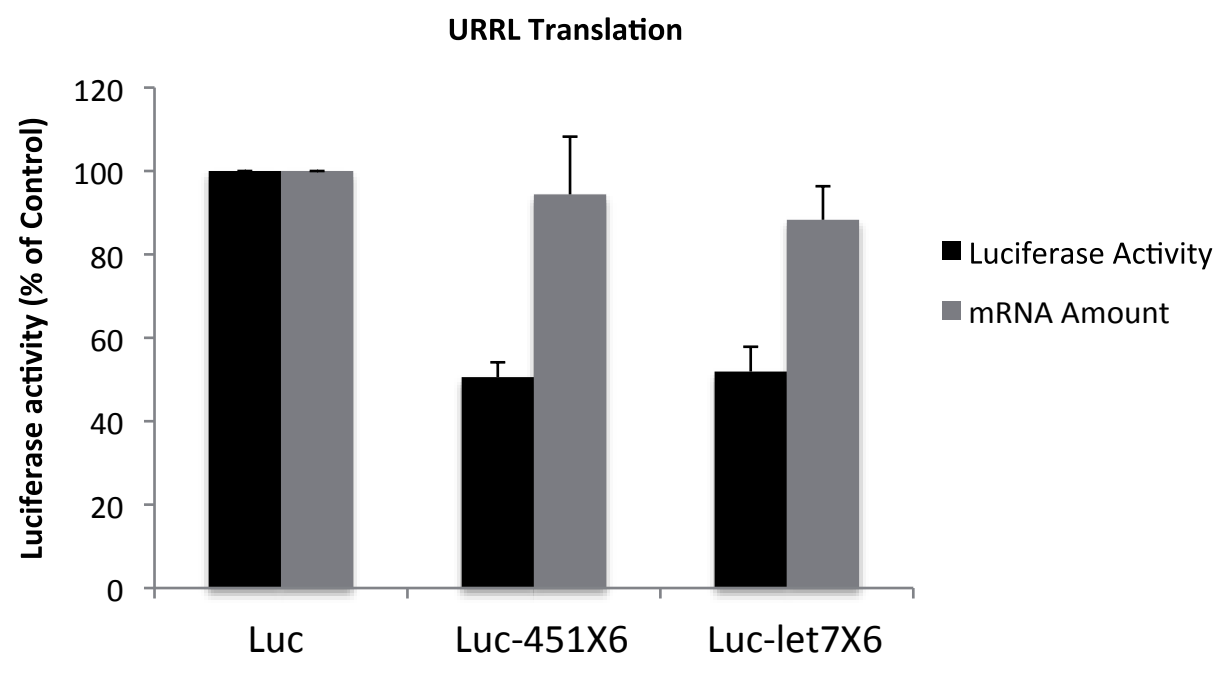

Supplementary Figure 5

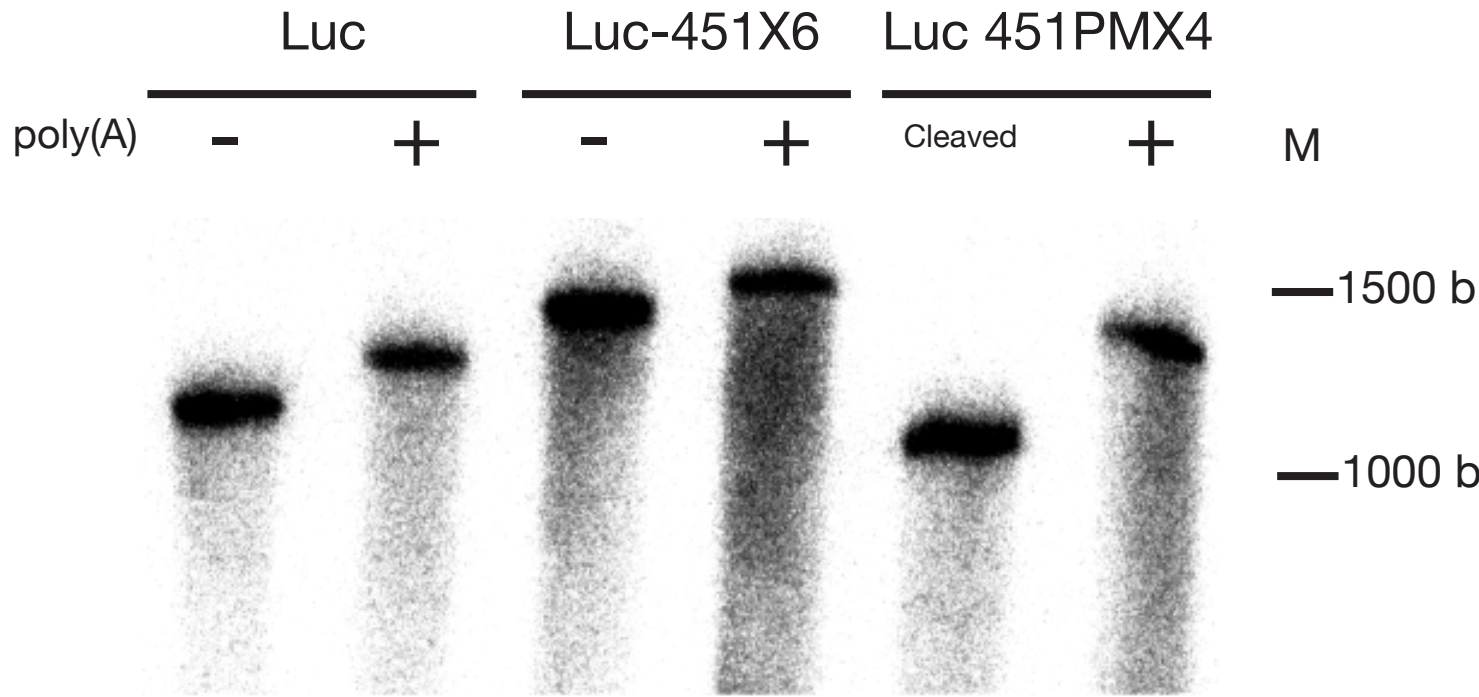

A

### Competitor mRNA Translation

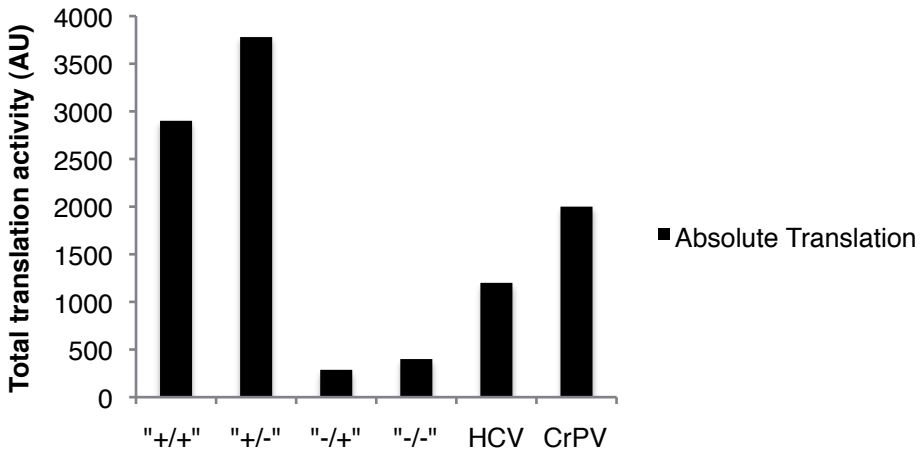

B

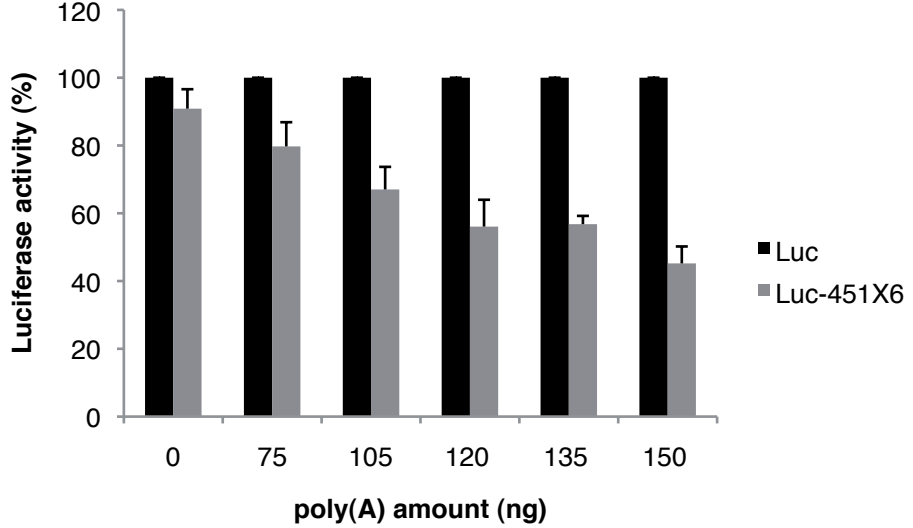

Supplement: supp_gkr086_Supplementary_Figures.pdf [file supp_gkr086_Supplementary_Figures.pdf]
