# Supplementary material for: Activation of a microRNA response in trans reveals a new role for poly(A) in translational repression
Source: PubMed Central journal article supplement — Nucleic Acids Res. 2011 Mar 8;39(12):5215–31. doi: 10.1093/nar/gkr086 (PMC3130266; doi:10.1093/nar/gkr086), 2011-03-08
Supplement: supp_gkr086_Supplementary_Table_1.pdf [file supp_gkr086_Supplementary_Table_1.pdf]

| No. | Probe_ID       | Sample A        |                 |              | Number of Detectable Repeats |
|-----|----------------|-----------------|-----------------|--------------|------------------------------|
|     |                | Averaged Signal | Spot-Spot StDev | Spot-Spot CV |                              |
| 1   | age-miR-198    | 127,70          | 7,37            | 0,06         | 2 out of 2                   |
| 2   | age-miR-222    | 40,64           | 10,50           | 0,26         | 2 out of 2                   |
| 3   | bta-let-7e     | 4 462,30        | 482,45          | 0,11         | 2 out of 2                   |
| 4   | bta-miR-106    | 2 079,79        | 251,38          | 0,12         | 2 out of 2                   |
| 5   | bta-miR-107    | 1 161,66        | 229,58          | 0,20         | 2 out of 2                   |
| 6   | bta-miR-125a   | 70,83           | 14,25           | 0,20         | 2 out of 2                   |
| 7   | bta-miR-126    | 23,29           | 5,81            | 0,25         | 2 out of 2                   |
| 8   | bta-miR-139    | 18,40           |                 |              | 1 out of 2                   |
| 9   | bta-miR-140    | 325,68          | 52,55           | 0,16         | 2 out of 2                   |
| 10  | bta-miR-142    | 81,45           | 24,24           | 0,30         | 2 out of 2                   |
| 11  | bta-miR-150    | 142,14          | 33,65           | 0,24         | 2 out of 2                   |
| 12  | bta-miR-15a    | 5 914,58        | 1 081,72        | 0,18         | 2 out of 2                   |
| 13  | bta-miR-16     | 13 807,34       | 2 737,10        | 0,20         | 2 out of 2                   |
| 14  | bta-miR-181a   | 72,24           | 18,75           | 0,26         | 2 out of 2                   |
| 15  | bta-miR-181b   | 83,37           | 19,12           | 0,23         | 2 out of 2                   |
| 16  | bta-miR-18b    | 141,76          | 38,08           | 0,27         | 2 out of 2                   |
| 17  | bta-miR-192    | 45,92           |                 |              | 1 out of 2                   |
| 18  | bta-miR-195    | 468,23          | 125,64          | 0,27         | 2 out of 2                   |
| 19  | bta-miR-200b   | 20,16           |                 |              | 1 out of 2                   |
| 20  | bta-miR-20b    | 2 094,28        | 146,33          | 0,07         | 2 out of 2                   |
| 21  | bta-miR-21     | 18 737,27       | 173,86          | 0,01         | 2 out of 2                   |
| 22  | bta-miR-21*    | 27,62           | 8,61            | 0,31         | 2 out of 2                   |
| 23  | bta-miR-210    | 76,43           | 8,71            | 0,11         | 2 out of 2                   |
| 24  | bta-miR-221    | 37,21           |                 |              | 1 out of 2                   |
| 25  | bta-miR-23a    | 75,64           | 9,07            | 0,12         | 2 out of 2                   |
| 26  | bta-miR-26b    | 3 899,80        | 102,65          | 0,03         | 2 out of 2                   |
| 27  | bta-miR-27a    | 91,83           | 1,22            | 0,01         | 2 out of 2                   |
| 28  | bta-miR-29a    | 897,67          | 7,78            | 0,01         | 2 out of 2                   |
| 29  | bta-miR-29b    | 69,03           | 15,67           | 0,23         | 2 out of 2                   |
| 30  | bta-miR-30a-5p | 1 229,76        | 28,95           | 0,02         | 2 out of 2                   |
| 31  | bta-miR-30d    | 577,98          | 1,77            | 0,00         | 2 out of 2                   |
| 32  | bta-miR-30e-5p | 556,75          | 30,20           | 0,05         | 2 out of 2                   |
| 33  | bta-miR-342    | 340,96          | 57,98           | 0,17         | 2 out of 2                   |
| 34  | bta-miR-345    | 19,45           |                 |              | 1 out of 2                   |
| 35  | bta-miR-423    | 1 212,63        | 122,87          | 0,10         | 2 out of 2                   |
| 36  | bta-miR-425-5p | 388,83          | 21,77           | 0,06         | 2 out of 2                   |
| 37  | bta-miR-7      | 1 879,52        | 62,02           | 0,03         | 2 out of 2                   |
| 38  | bta-miR-93     | 2 272,46        | 186,64          | 0,08         | 2 out of 2                   |
| 39  | bta-miR-99a    | 24,29           | 3,67            | 0,15         | 2 out of 2                   |
| 40  | cfa-miR-450    | 21,39           | 5,00            | 0,23         | 2 out of 2                   |
| 41  | ggo-miR-101    | 133,15          | 22,64           | 0,17         | 2 out of 2                   |
| 42  | ggo-miR-105    | 18,87           |                 |              | 1 out of 2                   |
| 43  | ggo-miR-106a   | 1 935,83        | 52,52           | 0,03         | 2 out of 2                   |
| 44  | ggo-miR-133a   | 25,61           |                 |              | 1 out of 2                   |
| 45  | ggo-miR-134    | 22,56           |                 |              | 1 out of 2                   |
| 46  | ggo-miR-145    | 78,00           | 1,97            | 0,03         | 2 out of 2                   |
| 47  | ggo-miR-17-3p  | 21,20           |                 |              | 1 out of 2                   |
| 48  | ggo-miR-17-5p  | 2 534,21        | 98,60           | 0,04         | 2 out of 2                   |
| 49  | ggo-miR-18     | 318,32          | 33,88           | 0,11         | 2 out of 2                   |

|     |                 |           |        |      |            |
|-----|-----------------|-----------|--------|------|------------|
| 50  | ggo-miR-181b    | 84,77     | 4,52   | 0,05 | 2 out of 2 |
| 51  | ggo-miR-186     | 78,94     | 0,09   | 0,00 | 2 out of 2 |
| 52  | ggo-miR-187     | 32,76     |        |      | 1 out of 2 |
| 53  | ggo-miR-196     | 21,26     |        |      | 1 out of 2 |
| 54  | ggo-miR-198     | 68,78     | 5,95   | 0,09 | 2 out of 2 |
| 55  | ggo-miR-20      | 2 143,68  | 58,00  | 0,03 | 2 out of 2 |
| 56  | ggo-miR-216     | 18,88     |        |      | 1 out of 2 |
| 57  | ggo-miR-27a     | 82,07     | 22,15  | 0,27 | 2 out of 2 |
| 58  | ggo-miR-29a     | 1 129,11  |        |      | 1 out of 2 |
| 59  | ggo-miR-29b     | 27,12     |        |      | 1 out of 2 |
| 60  | ggo-miR-30b     | 2 502,62  | 3,38   | 0,00 | 2 out of 2 |
| 61  | ggo-miR-32      | 17,75     |        |      | 1 out of 2 |
| 62  | ggo-miR-7       | 1 146,30  | 20,07  | 0,02 | 2 out of 2 |
| 63  | ggo-miR-93      | 2 765,22  | 104,20 | 0,04 | 2 out of 2 |
| 64  | ggo-miR-96      | 21,78     |        |      | 1 out of 2 |
| 65  | hsa-let-7a      | 18 339,78 | 161,84 | 0,01 | 2 out of 2 |
| 66  | hsa-let-7b      | 5 905,99  | 0,19   | 0,00 | 2 out of 2 |
| 67  | hsa-let-7b*     | 176,90    | 31,68  | 0,18 | 2 out of 2 |
| 68  | hsa-let-7c      | 9 732,45  | 30,99  | 0,00 | 2 out of 2 |
| 69  | hsa-let-7c*     | 20,26     | 0,17   | 0,01 | 2 out of 2 |
| 70  | hsa-let-7d      | 12 011,15 | 74,03  | 0,01 | 2 out of 2 |
| 71  | hsa-let-7d*     | 259,99    | 4,19   | 0,02 | 2 out of 2 |
| 72  | hsa-let-7e      | 6 113,39  | 32,79  | 0,01 | 2 out of 2 |
| 73  | hsa-let-7e*     | 25,11     | 0,68   | 0,03 | 2 out of 2 |
| 74  | hsa-let-7f      | 17 506,31 | 97,66  | 0,01 | 2 out of 2 |
| 75  | hsa-let-7f-1*   | 77,90     | 9,20   | 0,12 | 2 out of 2 |
| 76  | hsa-let-7g      | 11 857,26 | 251,28 | 0,02 | 2 out of 2 |
| 77  | hsa-let-7i      | 12 957,36 | 163,72 | 0,01 | 2 out of 2 |
| 78  | hsa-miR-100     | 22,08     |        |      | 1 out of 2 |
| 79  | hsa-miR-101     | 177,20    | 23,38  | 0,13 | 2 out of 2 |
| 80  | hsa-miR-103     | 1 127,17  | 0,18   | 0,00 | 2 out of 2 |
| 81  | hsa-miR-105     | 20,88     |        |      | 1 out of 2 |
| 82  | hsa-miR-106a    | 2 568,20  | 17,85  | 0,01 | 2 out of 2 |
| 83  | hsa-miR-106a*   | 20,04     |        |      | 1 out of 2 |
| 84  | hsa-miR-106b    | 3 106,55  | 134,73 | 0,04 | 2 out of 2 |
| 85  | hsa-miR-106b*   | 299,27    | 24,14  | 0,08 | 2 out of 2 |
| 86  | hsa-miR-107     | 955,89    | 2,12   | 0,00 | 2 out of 2 |
| 87  | hsa-miR-122     | 2 078,17  | 51,15  | 0,02 | 2 out of 2 |
| 88  | hsa-miR-125a-3p | 48,84     | 7,20   | 0,15 | 2 out of 2 |
| 89  | hsa-miR-125a-5p | 69,38     | 0,02   | 0,00 | 2 out of 2 |
| 90  | hsa-miR-125b    | 105,50    | 13,07  | 0,12 | 2 out of 2 |
| 91  | hsa-miR-125b-1* | 22,00     | 0,56   | 0,03 | 2 out of 2 |
| 92  | hsa-miR-128a    | 1 338,95  | 8,19   | 0,01 | 2 out of 2 |
| 93  | hsa-miR-129-5p  | 128,30    | 3,06   | 0,02 | 2 out of 2 |
| 94  | hsa-miR-130a*   | 25,21     |        |      | 1 out of 2 |
| 95  | hsa-miR-130b    | 56,46     | 11,05  | 0,20 | 2 out of 2 |
| 96  | hsa-miR-132     | 58,50     | 7,92   | 0,14 | 2 out of 2 |
| 97  | hsa-miR-133a    | 31,52     | 3,32   | 0,11 | 2 out of 2 |
| 98  | hsa-miR-133b    | 29,82     | 7,51   | 0,25 | 2 out of 2 |
| 99  | hsa-miR-134     | 64,26     | 3,73   | 0,06 | 2 out of 2 |
| 100 | hsa-miR-137     | 17,23     |        |      | 1 out of 2 |
| 101 | hsa-miR-140-3p  | 334,43    | 17,78  | 0,05 | 2 out of 2 |
| 102 | hsa-miR-142-3p  | 71,94     | 7,39   | 0,10 | 2 out of 2 |

|     |                 |           |        |      |   |     |    |   |
|-----|-----------------|-----------|--------|------|---|-----|----|---|
| 103 | hsa-miR-142-5p  | 71,07     | 14,25  | 0,20 | 2 | out | of | 2 |
| 104 | hsa-miR-143     | 26,07     |        |      | 1 | out | of | 2 |
| 105 | hsa-miR-144     | 1 321,02  | 46,15  | 0,03 | 2 | out | of | 2 |
| 106 | hsa-miR-144*    | 1 800,64  | 4,88   | 0,00 | 2 | out | of | 2 |
| 107 | hsa-miR-145     | 78,69     | 5,18   | 0,07 | 2 | out | of | 2 |
| 108 | hsa-miR-146a    | 38,52     | 0,04   | 0,00 | 2 | out | of | 2 |
| 109 | hsa-miR-146b-5p | 41,19     | 0,28   | 0,01 | 2 | out | of | 2 |
| 110 | hsa-miR-148a    | 20,96     |        |      | 1 | out | of | 2 |
| 111 | hsa-miR-148a*   | 21,66     | 6,03   | 0,28 | 2 | out | of | 2 |
| 112 | hsa-miR-148b    | 200,37    | 4,34   | 0,02 | 2 | out | of | 2 |
| 113 | hsa-miR-149     | 45,46     | 10,23  | 0,22 | 2 | out | of | 2 |
| 114 | hsa-miR-149*    | 10 713,14 | 41,74  | 0,00 | 2 | out | of | 2 |
| 115 | hsa-miR-150     | 33,52     | 4,48   | 0,13 | 2 | out | of | 2 |
| 116 | hsa-miR-150*    | 374,13    | 27,40  | 0,07 | 2 | out | of | 2 |
| 117 | hsa-miR-151-3p  | 111,05    | 12,60  | 0,11 | 2 | out | of | 2 |
| 118 | hsa-miR-151-5p  | 596,98    | 28,57  | 0,05 | 2 | out | of | 2 |
| 119 | hsa-miR-152     | 26,44     |        |      | 1 | out | of | 2 |
| 120 | hsa-miR-153     | 18,55     |        |      | 1 | out | of | 2 |
| 121 | hsa-miR-154     | 18,31     |        |      | 1 | out | of | 2 |
| 122 | hsa-miR-155     | 147,79    | 26,30  | 0,18 | 2 | out | of | 2 |
| 123 | hsa-miR-15a     | 6 080,07  | 203,96 | 0,03 | 2 | out | of | 2 |
| 124 | hsa-miR-15a*    | 77,34     | 12,28  | 0,16 | 2 | out | of | 2 |
| 125 | hsa-miR-15b     | 20 172,02 | 181,02 | 0,01 | 2 | out | of | 2 |
| 126 | hsa-miR-15b*    | 26,11     |        |      | 1 | out | of | 2 |
| 127 | hsa-miR-16      | 17 630,26 | 45,85  | 0,00 | 2 | out | of | 2 |
| 128 | hsa-miR-16-1*   | 201,32    | 30,18  | 0,15 | 2 | out | of | 2 |
| 129 | hsa-miR-16-2*   | 24,62     |        |      | 1 | out | of | 2 |
| 130 | hsa-miR-17      | 2 700,89  | 62,79  | 0,02 | 2 | out | of | 2 |
| 131 | hsa-miR-17*     | 19,56     |        |      | 1 | out | of | 2 |
| 132 | hsa-miR-181a    | 115,43    | 10,94  | 0,09 | 2 | out | of | 2 |
| 133 | hsa-miR-181b    | 52,27     | 7,69   | 0,15 | 2 | out | of | 2 |
| 134 | hsa-miR-181d    | 25,79     | 5,72   | 0,22 | 2 | out | of | 2 |
| 135 | hsa-miR-182     | 24,31     |        |      | 1 | out | of | 2 |
| 136 | hsa-miR-182*    | 20,44     |        |      | 1 | out | of | 2 |
| 137 | hsa-miR-183     | 18,56     |        |      | 1 | out | of | 2 |
| 138 | hsa-miR-184     | 17,28     |        |      | 1 | out | of | 2 |
| 139 | hsa-miR-185     | 15 775,69 | 647,22 | 0,04 | 2 | out | of | 2 |
| 140 | hsa-miR-186     | 270,33    | 31,65  | 0,12 | 2 | out | of | 2 |
| 141 | hsa-miR-186*    | 218,20    | 27,00  | 0,12 | 2 | out | of | 2 |
| 142 | hsa-miR-187     | 36,19     | 11,58  | 0,32 | 2 | out | of | 2 |
| 143 | hsa-miR-187*    | 61,73     | 8,85   | 0,14 | 2 | out | of | 2 |
| 144 | hsa-miR-188-5p  | 142,64    | 30,65  | 0,21 | 2 | out | of | 2 |
| 145 | hsa-miR-18a     | 455,29    | 61,70  | 0,14 | 2 | out | of | 2 |
| 146 | hsa-miR-18a*    | 18,38     |        |      | 1 | out | of | 2 |
| 147 | hsa-miR-18b     | 227,80    | 68,43  | 0,30 | 2 | out | of | 2 |
| 148 | hsa-miR-18b*    | 25,00     |        |      | 1 | out | of | 2 |
| 149 | hsa-miR-190     | 24,15     |        |      | 1 | out | of | 2 |
| 150 | hsa-miR-190b    | 22,05     |        |      | 1 | out | of | 2 |
| 151 | hsa-miR-191     | 3 677,41  | 66,02  | 0,02 | 2 | out | of | 2 |
| 152 | hsa-miR-191*    | 160,64    | 24,38  | 0,15 | 2 | out | of | 2 |
| 153 | hsa-miR-192     | 79,52     | 12,08  | 0,15 | 2 | out | of | 2 |
| 154 | hsa-miR-193a-5p | 255,80    | 15,81  | 0,06 | 2 | out | of | 2 |
| 155 | hsa-miR-193b    | 22,67     | 6,71   | 0,30 | 2 | out | of | 2 |

|                      |    |        |        |      |            |
|----------------------|----|--------|--------|------|------------|
| 156 hsa-miR-193b*    |    | 29,77  | 2,51   | 0,08 | 2 out of 2 |
| 157 hsa-miR-194      |    | 66,51  | 2,48   | 0,04 | 2 out of 2 |
| 158 hsa-miR-194*     |    | 28,99  | 16,89  | 0,58 | 2 out of 2 |
| 159 hsa-miR-195      | 2  | 569,48 | 78,12  | 0,03 | 2 out of 2 |
| 160 hsa-miR-195*     |    | 215,35 | 11,57  | 0,05 | 2 out of 2 |
| 161 hsa-miR-196b     |    | 26,64  | 7,01   | 0,26 | 2 out of 2 |
| 162 hsa-miR-197      |    | 51,78  | 5,27   | 0,10 | 2 out of 2 |
| 163 hsa-miR-198      |    | 57,43  | 8,26   | 0,14 | 2 out of 2 |
| 164 hsa-miR-199a-3p  |    | 29,86  |        |      | 1 out of 2 |
| 165 hsa-miR-199a-5p  |    | 24,62  |        |      | 1 out of 2 |
| 166 hsa-miR-19a      |    | 198,00 | 6,68   | 0,03 | 2 out of 2 |
| 167 hsa-miR-19b      | 2  | 885,70 | 88,17  | 0,03 | 2 out of 2 |
| 168 hsa-miR-19b-1*   |    | 26,48  |        |      | 1 out of 2 |
| 169 hsa-miR-19b-2*   |    | 17,84  |        |      | 1 out of 2 |
| 170 hsa-miR-200a     |    | 26,46  |        |      | 1 out of 2 |
| 171 hsa-miR-200a*    |    | 30,89  |        |      | 1 out of 2 |
| 172 hsa-miR-200b     |    | 30,08  |        |      | 1 out of 2 |
| 173 hsa-miR-200b*    |    | 30,69  |        |      | 1 out of 2 |
| 174 hsa-miR-200c     |    | 30,36  |        |      | 1 out of 2 |
| 175 hsa-miR-202      |    | 37,73  | 1,74   | 0,05 | 2 out of 2 |
| 176 hsa-miR-202*     |    | 25,34  |        |      | 1 out of 2 |
| 177 hsa-miR-203      |    | 645,17 | 30,38  | 0,05 | 2 out of 2 |
| 178 hsa-miR-204      |    | 26,02  | 5,96   | 0,23 | 2 out of 2 |
| 179 hsa-miR-205      |    | 26,81  |        |      | 1 out of 2 |
| 180 hsa-miR-206      |    | 31,07  |        |      | 1 out of 2 |
| 181 hsa-miR-208b     |    | 20,30  |        |      | 1 out of 2 |
| 182 hsa-miR-20a      | 3  | 133,21 | 9,38   | 0,00 | 2 out of 2 |
| 183 hsa-miR-20a*     |    | 17,49  |        |      | 1 out of 2 |
| 184 hsa-miR-20b      | 1  | 521,94 | 23,94  | 0,02 | 2 out of 2 |
| 185 hsa-miR-21       | 12 | 105,45 | 5,71   | 0,00 | 2 out of 2 |
| 186 hsa-miR-210      |    | 49,87  | 8,68   | 0,17 | 2 out of 2 |
| 187 hsa-miR-211      |    | 42,78  | 1,53   | 0,04 | 2 out of 2 |
| 188 hsa-miR-212      |    | 28,87  | 0,55   | 0,02 | 2 out of 2 |
| 189 hsa-miR-214      |    | 34,25  | 4,73   | 0,14 | 2 out of 2 |
| 190 hsa-miR-215      |    | 17,90  |        |      | 1 out of 2 |
| 191 hsa-miR-218-2*   |    | 26,66  | 5,98   | 0,22 | 2 out of 2 |
| 192 hsa-miR-219-2-3p |    | 18,48  |        |      | 1 out of 2 |
| 193 hsa-miR-219-5p   |    | 25,05  |        |      | 1 out of 2 |
| 194 hsa-miR-22       |    | 183,32 | 1,50   | 0,01 | 2 out of 2 |
| 195 hsa-miR-221      |    | 31,30  | 1,32   | 0,04 | 2 out of 2 |
| 196 hsa-miR-223      |    | 84,20  | 11,84  | 0,14 | 2 out of 2 |
| 197 hsa-miR-23a      |    | 126,83 | 3,60   | 0,03 | 2 out of 2 |
| 198 hsa-miR-23b      |    | 167,29 | 18,92  | 0,11 | 2 out of 2 |
| 199 hsa-miR-24       |    | 128,64 | 9,54   | 0,07 | 2 out of 2 |
| 200 hsa-miR-25       | 11 | 433,69 | 395,50 | 0,03 | 2 out of 2 |
| 201 hsa-miR-26a      | 8  | 814,96 | 167,70 | 0,02 | 2 out of 2 |
| 202 hsa-miR-26b      | 3  | 278,61 | 85,09  | 0,03 | 2 out of 2 |
| 203 hsa-miR-27a      |    | 49,56  | 13,39  | 0,27 | 2 out of 2 |
| 204 hsa-miR-27b      |    | 91,12  | 7,88   | 0,09 | 2 out of 2 |
| 205 hsa-miR-296-3p   |    | 20,80  |        |      | 1 out of 2 |
| 206 hsa-miR-296-5p   |    | 44,35  | 0,71   | 0,02 | 2 out of 2 |
| 207 hsa-miR-299-3p   |    | 23,58  | 3,68   | 0,16 | 2 out of 2 |
| 208 hsa-miR-299-5p   |    | 22,25  | 5,36   | 0,24 | 2 out of 2 |

|     |                |          |       |      |            |
|-----|----------------|----------|-------|------|------------|
| 209 | hsa-miR-29a    | 858,65   | 72,93 | 0,08 | 2 out of 2 |
| 210 | hsa-miR-29c    | 109,34   | 7,95  | 0,07 | 2 out of 2 |
| 211 | hsa-miR-29c*   | 18,42    |       |      | 1 out of 2 |
| 212 | hsa-miR-300    | 27,04    |       |      | 1 out of 2 |
| 213 | hsa-miR-301a   | 134,52   | 9,63  | 0,07 | 2 out of 2 |
| 214 | hsa-miR-302c*  | 98,90    | 22,52 | 0,23 | 2 out of 2 |
| 215 | hsa-miR-302d   | 19,11    |       |      | 1 out of 2 |
| 216 | hsa-miR-30a    | 306,22   | 10,19 | 0,03 | 2 out of 2 |
| 217 | hsa-miR-30b    | 1 700,50 | 26,01 | 0,02 | 2 out of 2 |
| 218 | hsa-miR-30b*   | 21,79    |       |      | 1 out of 2 |
| 219 | hsa-miR-30c    | 1 865,50 | 31,64 | 0,02 | 2 out of 2 |
| 220 | hsa-miR-30c-1* | 29,38    |       |      | 1 out of 2 |
| 221 | hsa-miR-30c-2* | 20,36    |       |      | 1 out of 2 |
| 222 | hsa-miR-30d    | 294,87   | 10,31 | 0,03 | 2 out of 2 |
| 223 | hsa-miR-30e    | 233,97   | 16,21 | 0,07 | 2 out of 2 |
| 224 | hsa-miR-30e*   | 31,67    |       |      | 1 out of 2 |
| 225 | hsa-miR-320    | 1 065,88 | 62,94 | 0,06 | 2 out of 2 |
| 226 | hsa-miR-323-5p | 128,02   | 28,98 | 0,23 | 2 out of 2 |
| 227 | hsa-miR-324-3p | 48,95    | 7,71  | 0,16 | 2 out of 2 |
| 228 | hsa-miR-324-5p | 42,50    |       |      | 1 out of 2 |
| 229 | hsa-miR-326    | 20,52    |       |      | 1 out of 2 |
| 230 | hsa-miR-328    | 30,03    |       |      | 1 out of 2 |
| 231 | hsa-miR-330-3p | 31,43    |       |      | 1 out of 2 |
| 232 | hsa-miR-330-5p | 28,57    |       |      | 1 out of 2 |
| 233 | hsa-miR-331-3p | 168,48   | 10,41 | 0,06 | 2 out of 2 |
| 234 | hsa-miR-331-5p | 31,16    |       |      | 1 out of 2 |
| 235 | hsa-miR-335    | 17,73    |       |      | 1 out of 2 |
| 236 | hsa-miR-335*   | 32,04    | 4,55  | 0,14 | 2 out of 2 |
| 237 | hsa-miR-337-3p | 17,63    |       |      | 1 out of 2 |
| 238 | hsa-miR-338-5p | 17,04    |       |      | 1 out of 2 |
| 239 | hsa-miR-339-3p | 59,69    | 3,84  | 0,06 | 2 out of 2 |
| 240 | hsa-miR-339-5p | 86,52    | 15,71 | 0,18 | 2 out of 2 |
| 241 | hsa-miR-33b    | 19,48    |       |      | 1 out of 2 |
| 242 | hsa-miR-33b*   | 46,60    | 1,02  | 0,02 | 2 out of 2 |
| 243 | hsa-miR-340    | 26,93    | 0,81  | 0,03 | 2 out of 2 |
| 244 | hsa-miR-340*   | 18,30    |       |      | 1 out of 2 |
| 245 | hsa-miR-342-3p | 329,99   | 17,99 | 0,05 | 2 out of 2 |
| 246 | hsa-miR-345    | 18,59    |       |      | 1 out of 2 |
| 247 | hsa-miR-346    | 35,18    | 1,81  | 0,05 | 2 out of 2 |
| 248 | hsa-miR-34a    | 26,85    |       |      | 1 out of 2 |
| 249 | hsa-miR-34a*   | 20,58    | 1,76  | 0,09 | 2 out of 2 |
| 250 | hsa-miR-34b    | 21,37    |       |      | 1 out of 2 |
| 251 | hsa-miR-34b*   | 22,26    |       |      | 1 out of 2 |
| 252 | hsa-miR-34c-3p | 513,43   | 62,04 | 0,12 | 2 out of 2 |
| 253 | hsa-miR-34c-5p | 18,19    |       |      | 1 out of 2 |
| 254 | hsa-miR-361-5p | 794,36   | 5,17  | 0,01 | 2 out of 2 |
| 255 | hsa-miR-362-5p | 17,76    |       |      | 1 out of 2 |
| 256 | hsa-miR-363    | 21,64    |       |      | 1 out of 2 |
| 257 | hsa-miR-365    | 28,99    |       |      | 1 out of 2 |
| 258 | hsa-miR-367    | 17,74    |       |      | 1 out of 2 |
| 259 | hsa-miR-369-5p | 24,44    |       |      | 1 out of 2 |
| 260 | hsa-miR-370    | 19,11    |       |      | 1 out of 2 |
| 261 | hsa-miR-371-3p | 18,73    |       |      | 1 out of 2 |

|     |                 |           |          |      |            |
|-----|-----------------|-----------|----------|------|------------|
| 262 | hsa-miR-371-5p  | 695,49    | 65,40    | 0,09 | 2 out of 2 |
| 263 | hsa-miR-372     | 24,44     |          |      | 1 out of 2 |
| 264 | hsa-miR-373     | 29,17     |          |      | 1 out of 2 |
| 265 | hsa-miR-373*    | 492,35    | 7,67     | 0,02 | 2 out of 2 |
| 266 | hsa-miR-374a    | 265,03    | 21,04    | 0,08 | 2 out of 2 |
| 267 | hsa-miR-374b    | 151,50    | 5,01     | 0,03 | 2 out of 2 |
| 268 | hsa-miR-375     | 258,53    | 8,75     | 0,03 | 2 out of 2 |
| 269 | hsa-miR-378     | 65,94     | 1,11     | 0,02 | 2 out of 2 |
| 270 | hsa-miR-379     | 26,52     |          |      | 1 out of 2 |
| 271 | hsa-miR-379*    | 24,45     |          |      | 1 out of 2 |
| 272 | hsa-miR-380     | 18,36     |          |      | 1 out of 2 |
| 273 | hsa-miR-380*    | 21,80     |          |      | 1 out of 2 |
| 274 | hsa-miR-381     | 20,14     |          |      | 1 out of 2 |
| 275 | hsa-miR-382     | 24,71     | 5,78     | 0,23 | 2 out of 2 |
| 276 | hsa-miR-409-3p  | 29,24     | 2,76     | 0,09 | 2 out of 2 |
| 277 | hsa-miR-411*    | 21,54     |          |      | 1 out of 2 |
| 278 | hsa-miR-421     | 460,66    | 36,25    | 0,08 | 2 out of 2 |
| 279 | hsa-miR-422a    | 23,42     | 2,29     | 0,10 | 2 out of 2 |
| 280 | hsa-miR-423-3p  | 26,00     | 10,05    | 0,39 | 2 out of 2 |
| 281 | hsa-miR-423-5p  | 2 043,21  | 79,91    | 0,04 | 2 out of 2 |
| 282 | hsa-miR-425     | 351,95    | 52,41    | 0,15 | 2 out of 2 |
| 283 | hsa-miR-425*    | 76,37     | 3,52     | 0,05 | 2 out of 2 |
| 284 | hsa-miR-431     | 19,12     |          |      | 1 out of 2 |
| 285 | hsa-miR-432     | 20,15     |          |      | 1 out of 2 |
| 286 | hsa-miR-451     | 54 962,62 | 2 574,47 | 0,05 | 2 out of 2 |
| 287 | hsa-miR-454     | 21,96     |          |      | 1 out of 2 |
| 288 | hsa-miR-455-5p  | 20,17     | 3,97     | 0,20 | 2 out of 2 |
| 289 | hsa-miR-483-3p  | 25,84     | 0,10     | 0,00 | 2 out of 2 |
| 290 | hsa-miR-483-5p  | 1 089,05  | 207,84   | 0,19 | 2 out of 2 |
| 291 | hsa-miR-484     | 139,69    | 3,37     | 0,02 | 2 out of 2 |
| 292 | hsa-miR-485-3p  | 21,50     | 3,66     | 0,17 | 2 out of 2 |
| 293 | hsa-miR-486-3p  | 363,72    | 37,95    | 0,10 | 2 out of 2 |
| 294 | hsa-miR-486-5p  | 9 389,59  | 129,45   | 0,01 | 2 out of 2 |
| 295 | hsa-miR-489     | 28,43     | 8,59     | 0,30 | 2 out of 2 |
| 296 | hsa-miR-490-5p  | 17,16     |          |      | 1 out of 2 |
| 297 | hsa-miR-492     | 19,87     |          |      | 1 out of 2 |
| 298 | hsa-miR-493*    | 18,57     |          |      | 1 out of 2 |
| 299 | hsa-miR-494     | 163,80    | 12,92    | 0,08 | 2 out of 2 |
| 300 | hsa-miR-496     | 18,09     |          |      | 1 out of 2 |
| 301 | hsa-miR-498     | 252,08    | 9,10     | 0,04 | 2 out of 2 |
| 302 | hsa-miR-501-3p  | 19,19     |          |      | 1 out of 2 |
| 303 | hsa-miR-501-5p  | 20,01     |          |      | 1 out of 2 |
| 304 | hsa-miR-503     | 21,16     |          |      | 1 out of 2 |
| 305 | hsa-miR-505     | 33,88     |          |      | 1 out of 2 |
| 306 | hsa-miR-505*    | 83,64     | 7,23     | 0,09 | 2 out of 2 |
| 307 | hsa-miR-506     | 19,61     |          |      | 1 out of 2 |
| 308 | hsa-miR-507     | 20,68     |          |      | 1 out of 2 |
| 309 | hsa-miR-508-3p  | 23,07     |          |      | 1 out of 2 |
| 310 | hsa-miR-508-5p  | 22,80     |          |      | 1 out of 2 |
| 311 | hsa-miR-509-3p  | 26,17     | 1,71     | 0,07 | 2 out of 2 |
| 312 | hsa-miR-513-3p  | 22,36     |          |      | 1 out of 2 |
| 313 | hsa-miR-513-5p  | 227,83    | 7,76     | 0,03 | 2 out of 2 |
| 314 | hsa-miR-516a-5p | 18,94     |          |      | 1 out of 2 |

|                     |           |        |      |            |
|---------------------|-----------|--------|------|------------|
| 315 hsa-miR-518c*   | 20,64     | 0,32   | 0,02 | 2 out of 2 |
| 316 hsa-miR-520d-5p | 18,15     |        |      | 1 out of 2 |
| 317 hsa-miR-541     | 18,41     |        |      | 1 out of 2 |
| 318 hsa-miR-541*    | 24,21     |        |      | 1 out of 2 |
| 319 hsa-miR-542-5p  | 487,87    | 41,46  | 0,08 | 2 out of 2 |
| 320 hsa-miR-550*    | 19,68     | 0,89   | 0,05 | 2 out of 2 |
| 321 hsa-miR-557     | 450,31    | 13,27  | 0,03 | 2 out of 2 |
| 322 hsa-miR-563     | 27,31     | 5,77   | 0,21 | 2 out of 2 |
| 323 hsa-miR-564     | 22,17     |        |      | 1 out of 2 |
| 324 hsa-miR-574-3p  | 70,24     | 11,13  | 0,16 | 2 out of 2 |
| 325 hsa-miR-574-5p  | 404,26    | 43,90  | 0,11 | 2 out of 2 |
| 326 hsa-miR-575     | 17,41     |        |      | 1 out of 2 |
| 327 hsa-miR-587     | 20,93     |        |      | 1 out of 2 |
| 328 hsa-miR-589*    | 36,64     |        |      | 1 out of 2 |
| 329 hsa-miR-593*    | 32,55     |        |      | 1 out of 2 |
| 330 hsa-miR-596     | 18,85     |        |      | 1 out of 2 |
| 331 hsa-miR-601     | 23,92     | 7,47   | 0,31 | 2 out of 2 |
| 332 hsa-miR-602     | 68,15     | 13,45  | 0,20 | 2 out of 2 |
| 333 hsa-miR-604     | 19,44     |        |      | 1 out of 2 |
| 334 hsa-miR-605     | 54,96     | 5,42   | 0,10 | 2 out of 2 |
| 335 hsa-miR-608     | 71,62     | 12,70  | 0,18 | 2 out of 2 |
| 336 hsa-miR-610     | 21,75     |        |      | 1 out of 2 |
| 337 hsa-miR-611     | 33,53     | 5,28   | 0,16 | 2 out of 2 |
| 338 hsa-miR-612     | 73,85     | 12,19  | 0,17 | 2 out of 2 |
| 339 hsa-miR-613     | 20,59     | 4,09   | 0,20 | 2 out of 2 |
| 340 hsa-miR-614     | 18,02     |        |      | 1 out of 2 |
| 341 hsa-miR-615-3p  | 60,77     | 17,52  | 0,29 | 2 out of 2 |
| 342 hsa-miR-615-5p  | 21,66     |        |      | 1 out of 2 |
| 343 hsa-miR-617     | 22,98     |        |      | 1 out of 2 |
| 344 hsa-miR-622     | 20,62     |        |      | 1 out of 2 |
| 345 hsa-miR-623     | 107,84    | 11,45  | 0,11 | 2 out of 2 |
| 346 hsa-miR-624*    | 17,59     |        |      | 1 out of 2 |
| 347 hsa-miR-625     | 28,89     | 2,71   | 0,09 | 2 out of 2 |
| 348 hsa-miR-625*    | 40,44     | 4,22   | 0,10 | 2 out of 2 |
| 349 hsa-miR-628-3p  | 51,74     | 11,30  | 0,22 | 2 out of 2 |
| 350 hsa-miR-629     | 20,10     |        |      | 1 out of 2 |
| 351 hsa-miR-629*    | 77,01     | 5,21   | 0,07 | 2 out of 2 |
| 352 hsa-miR-631     | 27,24     |        |      | 1 out of 2 |
| 353 hsa-miR-632     | 17,59     |        |      | 1 out of 2 |
| 354 hsa-miR-634     | 29,17     |        |      | 1 out of 2 |
| 355 hsa-miR-636     | 36,11     | 10,34  | 0,29 | 2 out of 2 |
| 356 hsa-miR-637     | 416,47    | 12,60  | 0,03 | 2 out of 2 |
| 357 hsa-miR-638     | 26 572,95 | 529,72 | 0,02 | 2 out of 2 |
| 358 hsa-miR-640     | 28,10     |        |      | 1 out of 2 |
| 359 hsa-miR-641     | 36,32     |        |      | 1 out of 2 |
| 360 hsa-miR-642     | 27,48     |        |      | 1 out of 2 |
| 361 hsa-miR-645     | 20,20     |        |      | 1 out of 2 |
| 362 hsa-miR-647     | 21,26     | 2,26   | 0,11 | 2 out of 2 |
| 363 hsa-miR-648     | 20,36     |        |      | 1 out of 2 |
| 364 hsa-miR-650     | 21,81     |        |      | 1 out of 2 |
| 365 hsa-miR-651     | 21,68     |        |      | 1 out of 2 |
| 366 hsa-miR-652     | 71,54     | 17,72  | 0,25 | 2 out of 2 |
| 367 hsa-miR-654-3p  | 27,49     |        |      | 1 out of 2 |

|     |                |           |        |      |   |     |    |   |
|-----|----------------|-----------|--------|------|---|-----|----|---|
| 368 | hsa-miR-654-5p | 455,73    | 13,35  | 0,03 | 2 | out | of | 2 |
| 369 | hsa-miR-656    | 27,31     |        |      | 1 | out | of | 2 |
| 370 | hsa-miR-657    | 24,24     |        |      | 1 | out | of | 2 |
| 371 | hsa-miR-658    | 2 049,53  | 248,36 | 0,12 | 2 | out | of | 2 |
| 372 | hsa-miR-659    | 68,71     | 2,71   | 0,04 | 2 | out | of | 2 |
| 373 | hsa-miR-661    | 19,47     |        |      | 1 | out | of | 2 |
| 374 | hsa-miR-662    | 24,10     |        |      | 1 | out | of | 2 |
| 375 | hsa-miR-663    | 4 466,69  | 254,41 | 0,06 | 2 | out | of | 2 |
| 376 | hsa-miR-665    | 22,75     |        |      | 1 | out | of | 2 |
| 377 | hsa-miR-668    | 24,15     |        |      | 1 | out | of | 2 |
| 378 | hsa-miR-671-3p | 21,68     |        |      | 1 | out | of | 2 |
| 379 | hsa-miR-671-5p | 10 495,69 | 362,78 | 0,03 | 2 | out | of | 2 |
| 380 | hsa-miR-672    | 30,96     |        |      | 1 | out | of | 2 |
| 381 | hsa-miR-675    | 223,91    | 5,82   | 0,03 | 2 | out | of | 2 |
| 382 | hsa-miR-7      | 1 559,63  | 41,17  | 0,03 | 2 | out | of | 2 |
| 383 | hsa-miR-7-1*   | 33,60     |        |      | 1 | out | of | 2 |
| 384 | hsa-miR-744    | 296,31    | 19,60  | 0,07 | 2 | out | of | 2 |
| 385 | hsa-miR-744*   | 18,79     |        |      | 1 | out | of | 2 |
| 386 | hsa-miR-765    | 4 729,11  | 453,84 | 0,10 | 2 | out | of | 2 |
| 387 | hsa-miR-766    | 72,82     | 11,82  | 0,16 | 2 | out | of | 2 |
| 388 | hsa-miR-872    | 31,60     | 16,43  | 0,52 | 2 | out | of | 2 |
| 389 | hsa-miR-874    | 99,84     | 21,26  | 0,21 | 2 | out | of | 2 |
| 390 | hsa-miR-877    | 59,25     | 15,01  | 0,25 | 2 | out | of | 2 |
| 391 | hsa-miR-877*   | 25,90     | 7,39   | 0,29 | 2 | out | of | 2 |
| 392 | hsa-miR-885-3p | 110,04    | 36,50  | 0,33 | 2 | out | of | 2 |
| 393 | hsa-miR-885-5p | 357,57    | 48,95  | 0,14 | 2 | out | of | 2 |
| 394 | hsa-miR-886-3p | 117,01    | 20,76  | 0,18 | 2 | out | of | 2 |
| 395 | hsa-miR-891a   | 22,70     |        |      | 1 | out | of | 2 |
| 396 | hsa-miR-920    | 17,75     |        |      | 1 | out | of | 2 |
| 397 | hsa-miR-921    | 28,66     |        |      | 1 | out | of | 2 |
| 398 | hsa-miR-923    | 18 599,56 | 612,06 | 0,03 | 2 | out | of | 2 |
| 399 | hsa-miR-92a    | 15 246,22 | 48,87  | 0,00 | 2 | out | of | 2 |
| 400 | hsa-miR-92b    | 7 599,92  | 272,72 | 0,04 | 2 | out | of | 2 |
| 401 | hsa-miR-92b*   | 19,62     |        |      | 1 | out | of | 2 |
| 402 | hsa-miR-93     | 3 000,06  | 189,87 | 0,06 | 2 | out | of | 2 |
| 403 | hsa-miR-93*    | 53,21     |        |      | 1 | out | of | 2 |
| 404 | hsa-miR-933    | 214,43    | 59,67  | 0,28 | 2 | out | of | 2 |
| 405 | hsa-miR-936    | 22,56     | 5,03   | 0,22 | 2 | out | of | 2 |
| 406 | hsa-miR-937    | 27,10     |        |      | 1 | out | of | 2 |
| 407 | hsa-miR-939    | 518,99    | 61,51  | 0,12 | 2 | out | of | 2 |
| 408 | hsa-miR-940    | 1 046,57  | 86,35  | 0,08 | 2 | out | of | 2 |
| 409 | hsa-miR-942    | 21,93     | 2,55   | 0,12 | 2 | out | of | 2 |
| 410 | hsa-miR-943    | 22,33     | 1,38   | 0,06 | 2 | out | of | 2 |
| 411 | hsa-miR-95     | 21,14     |        |      | 1 | out | of | 2 |
| 412 | hsa-miR-96     | 19,39     |        |      | 1 | out | of | 2 |
| 413 | hsa-miR-98     | 2 834,78  | 99,04  | 0,03 | 2 | out | of | 2 |
| 414 | hsa-miR-99a    | 23,31     | 2,91   | 0,12 | 2 | out | of | 2 |
| 415 | hsa-miR-99b    | 130,82    | 8,93   | 0,07 | 2 | out | of | 2 |
| 416 | hsa-miR-99b*   | 33,73     | 1,34   | 0,04 | 2 | out | of | 2 |
| 417 | lca-miR-16     | 8 929,86  | 348,33 | 0,04 | 2 | out | of | 2 |
| 418 | lla-miR-198    | 25,31     |        |      | 1 | out | of | 2 |
| 419 | mdo-let-7d     | 9 213,58  | 227,23 | 0,02 | 2 | out | of | 2 |
| 420 | mdo-let-7g     | 11 160,58 | 402,43 | 0,04 | 2 | out | of | 2 |

|     |                 |    |        |          |      |   |     |    |   |
|-----|-----------------|----|--------|----------|------|---|-----|----|---|
| 421 | mdo-let-7i      | 11 | 487,92 | 403,97   | 0,04 | 2 | out | of | 2 |
| 422 | mdo-miR-100     |    | 18,05  |          |      | 1 | out | of | 2 |
| 423 | mdo-miR-10b     |    | 17,18  |          |      | 1 | out | of | 2 |
| 424 | mdo-miR-122     | 1  | 872,63 | 49,31    | 0,03 | 2 | out | of | 2 |
| 425 | mdo-miR-129     |    | 84,64  | 2,00     | 0,02 | 2 | out | of | 2 |
| 426 | mdo-miR-130a    |    | 23,97  |          |      | 1 | out | of | 2 |
| 427 | mdo-miR-135b    |    | 22,62  |          |      | 1 | out | of | 2 |
| 428 | mdo-miR-143     |    | 21,08  |          |      | 1 | out | of | 2 |
| 429 | mdo-miR-144     |    | 812,05 | 48,10    | 0,06 | 2 | out | of | 2 |
| 430 | mdo-miR-152     |    | 20,08  | 1,58     | 0,08 | 2 | out | of | 2 |
| 431 | mdo-miR-15a     | 6  | 438,34 | 417,81   | 0,06 | 2 | out | of | 2 |
| 432 | mdo-miR-181b    |    | 99,88  | 19,47    | 0,19 | 2 | out | of | 2 |
| 433 | mdo-miR-187     |    | 30,88  | 10,85    | 0,35 | 2 | out | of | 2 |
| 434 | mdo-miR-191     | 4  | 071,62 | 321,33   | 0,08 | 2 | out | of | 2 |
| 435 | mdo-miR-203     |    | 338,20 | 3,41     | 0,01 | 2 | out | of | 2 |
| 436 | mdo-miR-206     |    | 21,19  |          |      | 1 | out | of | 2 |
| 437 | mdo-miR-22      |    | 479,36 | 75,99    | 0,16 | 2 | out | of | 2 |
| 438 | mdo-miR-23a     |    | 32,60  | 11,39    | 0,35 | 2 | out | of | 2 |
| 439 | mdo-miR-29a     |    | 23,49  |          |      | 1 | out | of | 2 |
| 440 | mdo-miR-34a     |    | 19,19  |          |      | 1 | out | of | 2 |
| 441 | mdo-miR-375     |    | 275,40 | 38,04    | 0,14 | 2 | out | of | 2 |
| 442 | mdo-miR-425     |    | 19,52  |          |      | 1 | out | of | 2 |
| 443 | mdo-miR-451     | 36 | 768,61 | 4 819,19 | 0,13 | 2 | out | of | 2 |
| 444 | mdo-miR-7       | 1  | 040,30 | 125,59   | 0,12 | 2 | out | of | 2 |
| 445 | mdo-miR-9*      |    | 17,78  |          |      | 1 | out | of | 2 |
| 446 | mm1-miR-198     |    | 123,45 | 6,80     | 0,06 | 2 | out | of | 2 |
| 447 | mmu-let-7a*     |    | 18,03  |          |      | 1 | out | of | 2 |
| 448 | mmu-miR-101a*   |    | 17,89  |          |      | 1 | out | of | 2 |
| 449 | mmu-miR-106a    | 1  | 666,13 | 110,95   | 0,07 | 2 | out | of | 2 |
| 450 | mmu-miR-141*    |    | 18,53  | 0,54     | 0,03 | 2 | out | of | 2 |
| 451 | mmu-miR-150*    |    | 24,70  |          |      | 1 | out | of | 2 |
| 452 | mmu-miR-155     |    | 26,47  |          |      | 1 | out | of | 2 |
| 453 | mmu-miR-15a*    |    | 51,57  | 6,33     | 0,12 | 2 | out | of | 2 |
| 454 | mmu-miR-16*     |    | 242,88 | 4,37     | 0,02 | 2 | out | of | 2 |
| 455 | mmu-miR-18a*    |    | 22,50  |          |      | 1 | out | of | 2 |
| 456 | mmu-miR-18b     |    | 34,72  | 4,09     | 0,12 | 2 | out | of | 2 |
| 457 | mmu-miR-191*    |    | 56,97  | 11,64    | 0,20 | 2 | out | of | 2 |
| 458 | mmu-miR-207     |    | 55,56  | 7,22     | 0,13 | 2 | out | of | 2 |
| 459 | mmu-miR-218-1*  |    | 33,29  | 2,80     | 0,08 | 2 | out | of | 2 |
| 460 | mmu-miR-290-3p  |    | 33,91  | 5,86     | 0,17 | 2 | out | of | 2 |
| 461 | mmu-miR-290-5p  |    | 298,14 | 4,40     | 0,01 | 2 | out | of | 2 |
| 462 | mmu-miR-291b-5p |    | 38,19  | 4,65     | 0,12 | 2 | out | of | 2 |
| 463 | mmu-miR-292-5p  |    | 26,49  |          |      | 1 | out | of | 2 |
| 464 | mmu-miR-295*    |    | 20,32  | 2,14     | 0,11 | 2 | out | of | 2 |
| 465 | mmu-miR-298     |    | 54,95  | 7,23     | 0,13 | 2 | out | of | 2 |
| 466 | mmu-miR-302c*   |    | 22,27  | 3,47     | 0,16 | 2 | out | of | 2 |
| 467 | mmu-miR-324-3p  |    | 79,03  | 26,85    | 0,34 | 2 | out | of | 2 |
| 468 | mmu-miR-325     |    | 25,23  | 1,09     | 0,04 | 2 | out | of | 2 |
| 469 | mmu-miR-327     |    | 35,09  |          |      | 1 | out | of | 2 |
| 470 | mmu-miR-337-3p  |    | 19,76  | 0,31     | 0,02 | 2 | out | of | 2 |
| 471 | mmu-miR-339-3p  |    | 29,06  |          |      | 1 | out | of | 2 |
| 472 | mmu-miR-341     |    | 61,34  | 25,23    | 0,41 | 2 | out | of | 2 |
| 473 | mmu-miR-344     |    | 75,14  | 5,90     | 0,08 | 2 | out | of | 2 |

|                     |           |        |      |            |
|---------------------|-----------|--------|------|------------|
| 474 mmu-miR-345-5p  | 19,75     |        |      | 1 out of 2 |
| 475 mmu-miR-346     | 44,15     | 12,11  | 0,27 | 2 out of 2 |
| 476 mmu-miR-34b-3p  | 23,45     |        |      | 1 out of 2 |
| 477 mmu-miR-34c*    | 62,28     | 5,58   | 0,09 | 2 out of 2 |
| 478 mmu-miR-350     | 26,32     | 2,73   | 0,10 | 2 out of 2 |
| 479 mmu-miR-351     | 29,55     | 5,02   | 0,17 | 2 out of 2 |
| 480 mmu-miR-374*    | 20,88     |        |      | 1 out of 2 |
| 481 mmu-miR-382*    | 20,72     |        |      | 1 out of 2 |
| 482 mmu-miR-383     | 18,15     |        |      | 1 out of 2 |
| 483 mmu-miR-384-5p  | 20,13     |        |      | 1 out of 2 |
| 484 mmu-miR-425*    | 43,53     | 13,14  | 0,30 | 2 out of 2 |
| 485 mmu-miR-429     | 19,05     |        |      | 1 out of 2 |
| 486 mmu-miR-434-3p  | 134,87    | 4,17   | 0,03 | 2 out of 2 |
| 487 mmu-miR-449b    | 20,81     | 1,02   | 0,05 | 2 out of 2 |
| 488 mmu-miR-452     | 22,14     |        |      | 1 out of 2 |
| 489 mmu-miR-465c-5p | 18,27     | 1,49   | 0,08 | 2 out of 2 |
| 490 mmu-miR-466f-3p | 67,34     | 6,41   | 0,10 | 2 out of 2 |
| 491 mmu-miR-466f-5p | 39,54     | 2,26   | 0,06 | 2 out of 2 |
| 492 mmu-miR-466g    | 35,70     | 6,52   | 0,18 | 2 out of 2 |
| 493 mmu-miR-466h    | 37,02     | 4,15   | 0,11 | 2 out of 2 |
| 494 mmu-miR-467a*   | 52,98     | 8,83   | 0,17 | 2 out of 2 |
| 495 mmu-miR-467b*   | 36,45     | 0,11   | 0,00 | 2 out of 2 |
| 496 mmu-miR-467c    | 19,79     |        |      | 1 out of 2 |
| 497 mmu-miR-468     | 24,07     | 0,01   | 0,00 | 2 out of 2 |
| 498 mmu-miR-469     | 25,90     |        |      | 1 out of 2 |
| 499 mmu-miR-483     | 1 029,08  | 22,29  | 0,02 | 2 out of 2 |
| 500 mmu-miR-483*    | 35,69     | 3,74   | 0,10 | 2 out of 2 |
| 501 mmu-miR-485*    | 58,74     | 1,02   | 0,02 | 2 out of 2 |
| 502 mmu-miR-489     | 21,74     |        |      | 1 out of 2 |
| 503 mmu-miR-501-3p  | 20,36     | 0,43   | 0,02 | 2 out of 2 |
| 504 mmu-miR-501-5p  | 18,40     |        |      | 1 out of 2 |
| 505 mmu-miR-666-3p  | 101,05    | 26,52  | 0,26 | 2 out of 2 |
| 506 mmu-miR-667     | 27,43     | 6,52   | 0,24 | 2 out of 2 |
| 507 mmu-miR-668     | 30,56     | 0,63   | 0,02 | 2 out of 2 |
| 508 mmu-miR-669c    | 26,36     |        |      | 1 out of 2 |
| 509 mmu-miR-678     | 881,47    | 17,10  | 0,02 | 2 out of 2 |
| 510 mmu-miR-680     | 356,24    | 34,37  | 0,10 | 2 out of 2 |
| 511 mmu-miR-683     | 17,43     |        |      | 1 out of 2 |
| 512 mmu-miR-685     | 45,43     | 25,54  | 0,56 | 2 out of 2 |
| 513 mmu-miR-686     | 58,63     | 23,10  | 0,39 | 2 out of 2 |
| 514 mmu-miR-689     | 2 090,20  | 109,78 | 0,05 | 2 out of 2 |
| 515 mmu-miR-691     | 23,38     |        |      | 1 out of 2 |
| 516 mmu-miR-692     | 46,20     | 14,46  | 0,31 | 2 out of 2 |
| 517 mmu-miR-698     | 30,70     |        |      | 1 out of 2 |
| 518 mmu-miR-699     | 40,71     | 5,85   | 0,14 | 2 out of 2 |
| 519 mmu-miR-700     | 117,34    | 1,45   | 0,01 | 2 out of 2 |
| 520 mmu-miR-702     | 100,59    | 28,21  | 0,28 | 2 out of 2 |
| 521 mmu-miR-705     | 18 755,59 | 636,02 | 0,03 | 2 out of 2 |
| 522 mmu-miR-706     | 19,01     | 0,47   | 0,02 | 2 out of 2 |
| 523 mmu-miR-707     | 70,52     | 15,77  | 0,22 | 2 out of 2 |
| 524 mmu-miR-709     | 4 424,64  | 113,12 | 0,03 | 2 out of 2 |
| 525 mmu-miR-711     | 54,93     | 21,65  | 0,39 | 2 out of 2 |
| 526 mmu-miR-712     | 32,06     |        |      | 1 out of 2 |

|                     |    |        |          |      |   |     |    |   |
|---------------------|----|--------|----------|------|---|-----|----|---|
| 527 mmu-miR-712*    |    | 46,87  | 11,27    | 0,24 | 2 | out | of | 2 |
| 528 mmu-miR-713     |    | 25,69  |          |      | 1 | out | of | 2 |
| 529 mmu-miR-714     | 3  | 756,80 | 221,00   | 0,06 | 2 | out | of | 2 |
| 530 mmu-miR-715     |    | 30,16  | 5,38     | 0,18 | 2 | out | of | 2 |
| 531 mmu-miR-720     | 1  | 921,76 | 177,45   | 0,09 | 2 | out | of | 2 |
| 532 mmu-miR-721     |    | 289,31 | 2,08     | 0,01 | 2 | out | of | 2 |
| 533 mmu-miR-741     |    | 18,54  |          |      | 1 | out | of | 2 |
| 534 mmu-miR-758     |    | 20,97  |          |      | 1 | out | of | 2 |
| 535 mmu-miR-762     | 28 | 838,83 | 3 671,15 | 0,13 | 2 | out | of | 2 |
| 536 mmu-miR-763     |    | 21,51  |          |      | 1 | out | of | 2 |
| 537 mmu-miR-764-5p  |    | 18,87  |          |      | 1 | out | of | 2 |
| 538 mmu-miR-770-3p  |    | 105,06 | 13,65    | 0,13 | 2 | out | of | 2 |
| 539 mmu-miR-7b      |    | 22,45  |          |      | 1 | out | of | 2 |
| 540 mmu-miR-872*    |    | 27,81  | 0,91     | 0,03 | 2 | out | of | 2 |
| 541 mmu-miR-877*    |    | 20,92  |          |      | 1 | out | of | 2 |
| 542 mmu-miR-883b-5p |    | 18,85  |          |      | 1 | out | of | 2 |
| 543 mmu-miR-92a     | 11 | 791,00 | 154,02   | 0,01 | 2 | out | of | 2 |
| 544 mmu-miR-92a*    |    | 19,36  |          |      | 1 | out | of | 2 |
| 545 mne-miR-197     |    | 46,10  | 1,51     | 0,03 | 2 | out | of | 2 |
| 546 oar-miR-431     |    | 22,80  |          |      | 1 | out | of | 2 |
| 547 ppa-miR-128a    |    | 794,10 | 18,77    | 0,02 | 2 | out | of | 2 |
| 548 ppa-miR-144     |    | 898,32 | 39,29    | 0,04 | 2 | out | of | 2 |
| 549 ppa-miR-188     |    | 34,40  |          |      | 1 | out | of | 2 |
| 550 ppa-miR-23b     |    | 163,33 | 17,74    | 0,11 | 2 | out | of | 2 |
| 551 ppy-miR-10a     |    | 25,24  |          |      | 1 | out | of | 2 |
| 552 ppy-miR-133a    |    | 27,43  | 8,37     | 0,30 | 2 | out | of | 2 |
| 553 ppy-miR-144     |    | 796,22 | 30,82    | 0,04 | 2 | out | of | 2 |
| 554 ptr-miR-133a    |    | 21,27  | 2,74     | 0,13 | 2 | out | of | 2 |
| 555 ptr-miR-216     |    | 17,24  |          |      | 1 | out | of | 2 |
| 556 ptr-miR-25      | 6  | 242,52 | 112,72   | 0,02 | 2 | out | of | 2 |
| 557 rno-miR-1*      |    | 18,59  |          |      | 1 | out | of | 2 |
| 558 rno-miR-135a*   |    | 23,37  | 3,12     | 0,13 | 2 | out | of | 2 |
| 559 rno-miR-143     |    | 24,63  | 2,45     | 0,10 | 2 | out | of | 2 |
| 560 rno-miR-200c    |    | 23,20  | 6,93     | 0,30 | 2 | out | of | 2 |
| 561 rno-miR-204*    |    | 20,06  | 0,78     | 0,04 | 2 | out | of | 2 |
| 562 rno-miR-207     |    | 38,33  | 0,73     | 0,02 | 2 | out | of | 2 |
| 563 rno-miR-20b-5p  | 1  | 028,13 | 27,35    | 0,03 | 2 | out | of | 2 |
| 564 rno-miR-214     |    | 31,06  | 3,27     | 0,11 | 2 | out | of | 2 |
| 565 rno-miR-223     |    | 731,39 | 60,46    | 0,08 | 2 | out | of | 2 |
| 566 rno-miR-224     |    | 165,62 | 18,71    | 0,11 | 2 | out | of | 2 |
| 567 rno-miR-290     |    | 129,81 | 10,93    | 0,08 | 2 | out | of | 2 |
| 568 rno-miR-324-3p  |    | 54,71  | 3,95     | 0,07 | 2 | out | of | 2 |
| 569 rno-miR-327     |    | 103,16 | 1,87     | 0,02 | 2 | out | of | 2 |
| 570 rno-miR-339-3p  |    | 51,92  | 0,98     | 0,02 | 2 | out | of | 2 |
| 571 rno-miR-340-3p  |    | 17,01  |          |      | 1 | out | of | 2 |
| 572 rno-miR-343     |    | 19,04  |          |      | 1 | out | of | 2 |
| 573 rno-miR-344-3p  |    | 35,98  | 3,04     | 0,08 | 2 | out | of | 2 |
| 574 rno-miR-347     |    | 191,62 | 37,17    | 0,19 | 2 | out | of | 2 |
| 575 rno-miR-349     |    | 52,64  | 8,80     | 0,17 | 2 | out | of | 2 |
| 576 rno-miR-350     |    | 31,01  |          |      | 1 | out | of | 2 |
| 577 rno-miR-352     | 1  | 603,07 | 197,75   | 0,12 | 2 | out | of | 2 |
| 578 rno-miR-409-3p  |    | 67,72  | 4,47     | 0,07 | 2 | out | of | 2 |
| 579 rno-miR-483     |    | 31,66  |          |      | 1 | out | of | 2 |

|                    |           |          |      |            |
|--------------------|-----------|----------|------|------------|
| 580 rno-miR-494    | 262,95    | 0,53     | 0,00 | 2 out of 2 |
| 581 rno-miR-505    | 63,99     | 9,49     | 0,15 | 2 out of 2 |
| 582 rno-miR-543*   | 20,08     |          |      | 1 out of 2 |
| 583 rno-miR-664    | 22,92     | 1,71     | 0,07 | 2 out of 2 |
| 584 rno-miR-760-5p | 29,84     |          |      | 1 out of 2 |
| 585 rno-miR-7a*    | 22,31     | 1,03     | 0,05 | 2 out of 2 |
| 586 sla-miR-198    | 40,17     | 6,29     | 0,16 | 2 out of 2 |
| 587 ssc-let-7i     | 12 179,84 | 543,78   | 0,04 | 2 out of 2 |
| 588 ssc-miR-122    | 1 794,94  | 88,36    | 0,05 | 2 out of 2 |
| 589 ssc-miR-15b    | 18 546,66 | 1 509,83 | 0,08 | 2 out of 2 |
